# Supplementary material
Source: publisher site journal article supplement (https://www.dovepress.com/article/424045)
Supplement: Supplementary file 1 [file get_supplementary_file.php]

**Supplementary methods**

### Reagents for *in vivo* experiments

Genexol®-PM (monomethoxy poly(ethylene glycol)-block-poly (D,L-lactide) – PTX ; mPEG-PDLLA-PTX; mic-PTX) was purchased from Samyang Biopharmaceuticals Corporation (Seoul, Korea) and Abraxane® (albumin-bound PTX; nab-PTX) from Celgene (New Jersey, USA). For the *in vivo* experiments, both were diluted in saline less than 15 minutes prior to injection. Isofluran (Forene®, AbbVie, Waver, Belgium), sevofluran (Sevorane®, AbbVie) and 1 mg/ml ketoprofen (Rofenid®, Sanofi Aventis, Diegem, Belgium) were used for anesthesia and analgesia of the animals, respectively.

Reagents and chemicals for pharmacokinetic analysis

Paclitaxel, 13C6-Paclitaxel (internal standard (IS)), 3'-p-hydroxy-paclitaxel, 6α-hydroxy-paclitaxel, 6α-hydroxy-paclitaxel-d5 (IS), 6α,3'-p-dihydroxy-paclitaxel, and 7-epi-paclitaxel were all purchased from Toronto Research Chemicals (Toronto, Canada). ULC-MS grade water and methanol were obtained from Biosolve (Valkenswaard, The Netherlands). The PKI Bioanalysis Card (GR2261004) was supplied by PerkinElmer Health Sciences (Greenville, South Carolina, USA). All other solvents or chemicals were at minimum analytical grade.

Pharmacokinetic analysis of nab-PTX and mic-PTX in plasma and tissue

Instrumentation and set-up

*UHPLC-MS/MS*

An Acquity BEH C18 column (50 × 2.1 mm, 1.7 μm) with an Acquity BEH C18 VanGuard pre-column (5 × 2.1 mm, 1.7 μm) installed in an Acquity UPLC H-class system (Waters, Milford, MA, USA) was used for chromatographic separation. Mobile phases, delivered at 0.45 ml/min, consisted of 0.2% formic acid either in 90/10 (v/v) water/methanol (eluent A) or in methanol (eluent B). The total run time for each separation was 2.5 min, and the linear gradient elution program was as follows: 0-1.25 min, 50% B to 80% B; 1.25-1.5 min, 80% B to 100% B; 1.5-2.0 min, 100% B to 50% B; 2.0-2.5 min, 50% B. A divert valve program switching alternatively between detector and waste was incorporated as follows: 0-0.75 min: to waste; 0.75-2.0 min: to detector; 2.0-2.5 min: to waste. The column temperature was kept at 50 °C, and the injection volume was 10 μL.

The LC eluate was led directly into a Waters Xevo TQS tandem mass spectrometer (Waters, Milford, MA, USA) with electrospray ionization (ESI) in the positive-ion, multiple reaction monitoring (MRM) mode. The MS/MS instrument was operated with a capillary voltage of 3.0 kV and source temperature of 150 °C. The desolvation gas (nitrogen) flow rate was set to 1000 L/h at a temperature of 600 °C, and collision gas (argon) flow was maintained at 0.15 ml/min.

DBS sample preparation and extraction

Aliquots (10 μL each) of whole blood samples were spotted onto PKI Bioanalysis Cards (PerkinElmer Health Sciences, USA) with a calibrated pipette and left to dry for at least 3 h at room temperature prior to analysis. The entire dry blood spot (DBS) was punched out and collected into a 1.5-ml Eppendorf tube. Extraction was performed by adding 200 μL of IS working solution. The sample tubes were closed and thermostatted at 37 °C for 20 min whilst continuously being shaken by a Biosan TS-100 Thermo shaker (Biosan, Riga, Latvia) at 500 rpm. Then, 100 μL of the extract was added to 100 μL water and vortex-mixed for 30s. After transferring the resulting solution to an autosampler vial, a volume of 10 μL was injected into the UHPLC-MS/MS system.

Tissue concentration measurements

The total concentration of PTX in samples was determined by high-performance liquid chromatography (HPLC) coupled to a triple quadrupole mass spectrometer. The extraction procedure for PTX in tumor nodules was a modification of the method described by Ansaloni et al.28. Briefly, tissue samples were homogenized in 0.2 M CH3COONH4 pH 4.5 (1:3 wt/vol). The homogenates (0.5 ml) were added with 2 µg of internal standard (IS) IDN5390 (Indena SpA, Settala, Italy) and extracted with 4 mL of CH3CN. Samples were mixed for 30 minutes, centrifuged and then dried under nitrogen. The residues were dissolved with 200 µL of mobile phase and 10 µL were injected into the HPLC MS/MS system. Tumor nodules collected before treatment were used to prepare the calibration curve by the addition of PTX in the range 10–2500 ng/g. A triple quadrupole mass spectrometer (API4000 system, AB SCIEX, MA, USA) coupled with a Series 200 autosampler and micropump (Perkin Elmer, MA, USA) was used for detection. Samples were separated using a Sunfire C18 chromatographic column (3.5 µm 2.1 x 150 mm), coupled with a pre-column of the same material and thermostatically controlled at 30°C. The mobile phases of HCOOH 0.1% in H2O and HCCOH 0.1% in CH3CN were pumped at a flow rate of 0.2 mL min-1. The mass spectrometer used electrospray ionization in positive ion mode and selected reaction monitoring, using the target ions m/z 854.6/286.2 for PTX and m/z 788.4/327.1 for IS.

### Mass spectrometry imaging of paclitaxel

The spatial distribution of PTX in tumor tissues was determined by mass spectrometry imaging (MSI), according to the method that was recently published by Morosi and colleagues 29. Three frozen tissue sections of 10 μm for each sample were cut every 300 µm using a cryo-microtome (Leica Microsystems, Wetzler, Germany) and mounted on a pre-cooled matrix-assisted laser desorption/ionization (MALDI) plate (Opti-TOF 384 Well insert). Subsequently, the plate was dried in a vacuum drier and sprayed with a titanium dioxide (TiO2) matrix suspension using a BD 180 precision double-action trigger airbrush (Fengda®, Zhejiang, China) with a 0.20 mm nozzle diameter, using nitrogen at 0.2 bar. Care was taken to avoid over-spraying the matrix suspension on a single point to avoid the formation of droplets that would wet the surface with possible damage of the tissue structure, analyte diffusion or partial detachment of the slice from the plate. A MALDI 4800 coupled to a double time-of-flight (TOF-TOF; AB SCIEX Old Connecticut Path, Framingham, MA 01701, USA) was used, equipped with a 355-nm neodymium-doped (Nd):YAG laser with a 200 Hz repetition rate, controlled by 4000 Series Explorer™ software (AB SCIEX Old Connecticut Path, Framingham, MA 01701, USA). MS spectra were acquired with 20 laser shots with intensity of 6,000 arbitrary units, with a bin size of 1.0 ns, acquiring spectra in reflectron negative-ion mode. Images of tissue sections were acquired using the 4800 imaging tool software ([www.maldi-msi.org](http://www.maldi-msi.org), M. Stoeckli, Novartis Pharma, Basel, Switzerland), with a lateral resolution of 100 µm. Tissue view software 1.1 (AB SCIEX Old Connecticut Path, Framingham, MA 01701, USA) was used to process and display the ions distribution inside the tumor sections, by plotting the fragment ion at m/z 284.2 corresponding to the side chain with the amide-acyl group of the PTX molecule. Normalization of the PTX ion signal (*m/z* 284.2) was obtained computationally dividing its intensity by the intensity of a matrix ion (*m/z* 251.8) pixel by pixel, to compensate ion suppression effects due to different tissue histology 30. To obtain relative quantitative data, the mean PTX ion signal normalized to the matrix ion signal (m/z 251) was calculated in a ROI enclosing the whole tumor section for each time point.

**Supplementary table 1**

**Qupath positive cell detection parameters**

| Detection image | Optical density sum |
| --- | --- |
| Requested pixel size | 0.5 |
| **Nucleus parameters** |  |
| Background radius | 8µm |
| Median filter radius | 0 |
| Sigma | 1.25 |
| Minimum area | 10 |
| Maximum area | 400 |
| **Intensity parameters** |  |
| Treshold | 0.1 |
| Max background intensity | 0.5 |
| Split by shape | ON |
| Exclude DAB (membrane staining) | OFF |
| **Cell parameters** |  |
| Cell expansion | 5µm |
| Include cell nucleus | ON |
| **General parameters** |  |
| Smooth boundaries | ON |
| Make measurements | ON |
